# Supplementary material for: Conserved mechanisms of microtubule-stimulated ADP release, ATP binding, and force generation in transport kinesins
Source: eLife journal article supplement (doi:10.7554/elife.03680), 2014-09-10
Supplement: supp [file elife_poa_e03680_Figure_2_figure_supplement_1.pdf › elife_poa_e03680_Figure_2_figure_supplement_1.pdf]

A *Mg*-AMPPNP

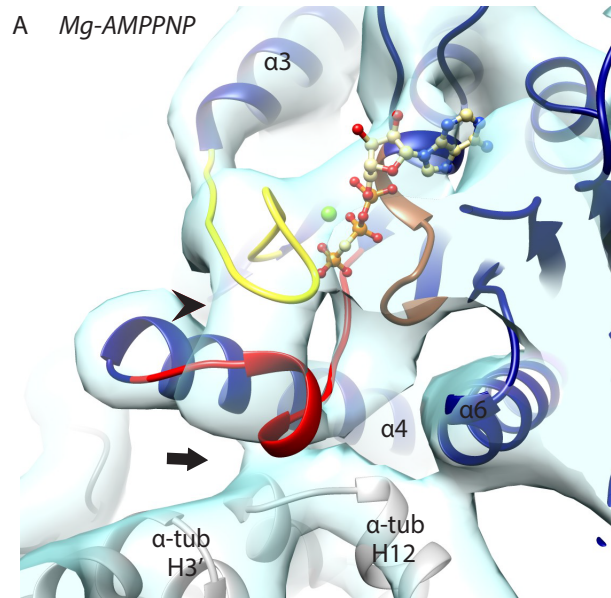

**Kin3-MT**

B *Mg*-ADPAIFx

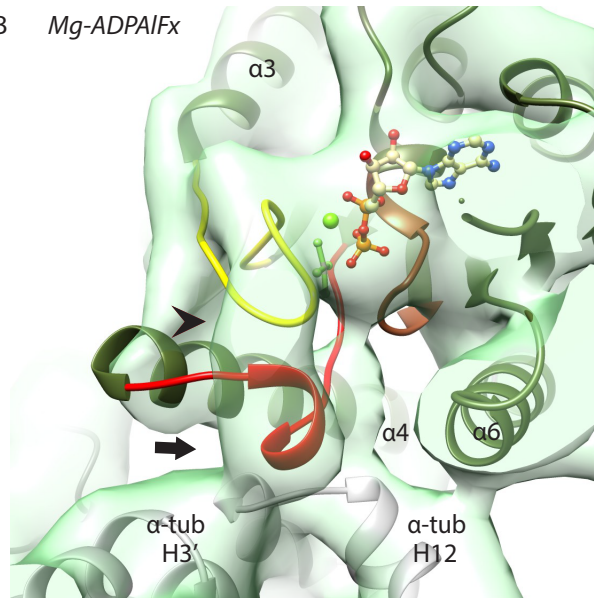

**Kin1-MT**

**Figure 2 S1**

**Models**

 Kin3-Mg-AMPPNP-MT

 Kin1-Mg-ADPAIFx-MT

  $\alpha$ -tubulin (PDB 1JFF)

  $\beta$ -tubulin (PDB 1JFF)

**Motifs**

 Loop 9

 P-loop

 Loop 11
