# Supplementary material for: Conserved mechanisms of microtubule-stimulated ADP release, ATP binding, and force generation in transport kinesins
Source: eLife journal article supplement (doi:10.7554/elife.03680), 2014-09-10
Supplement: supp [file elife_poa_e03680_Figure_2_figure_supplement_2.pdf › elife_poa_e03680_Figure_2_figure_supplement_2.pdf]

A

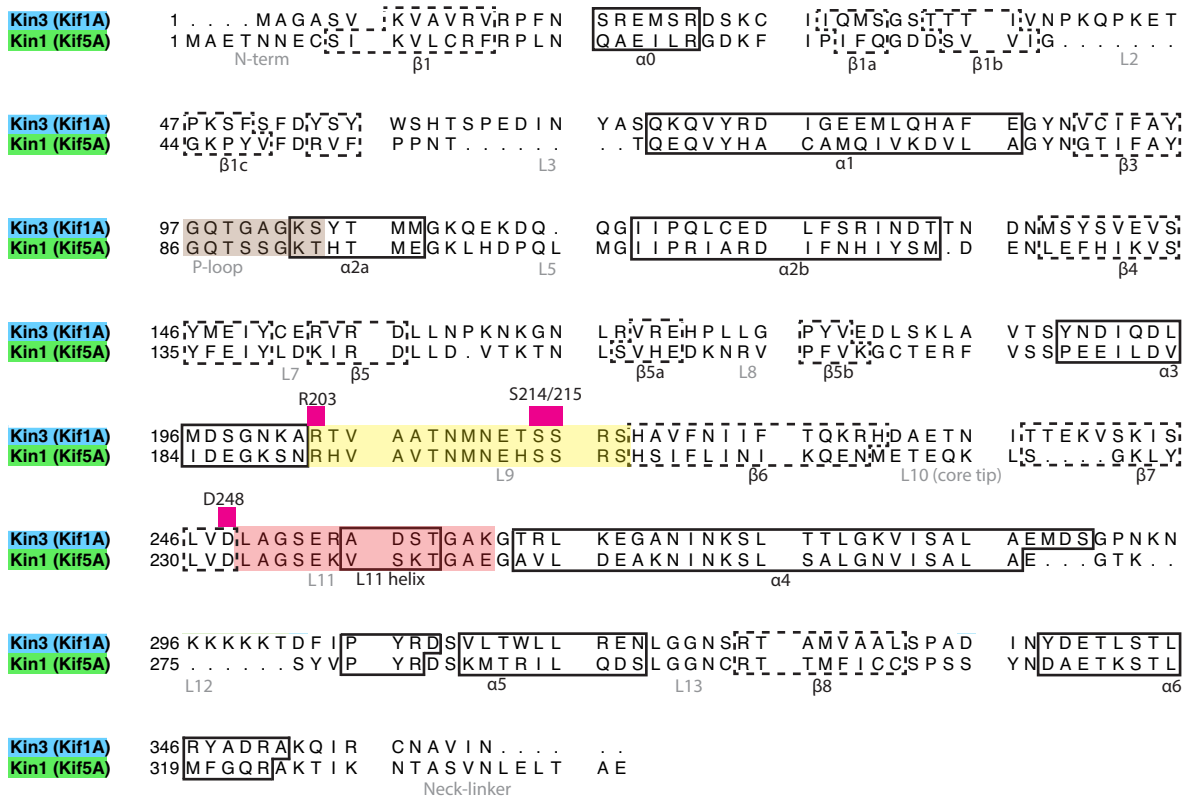

B

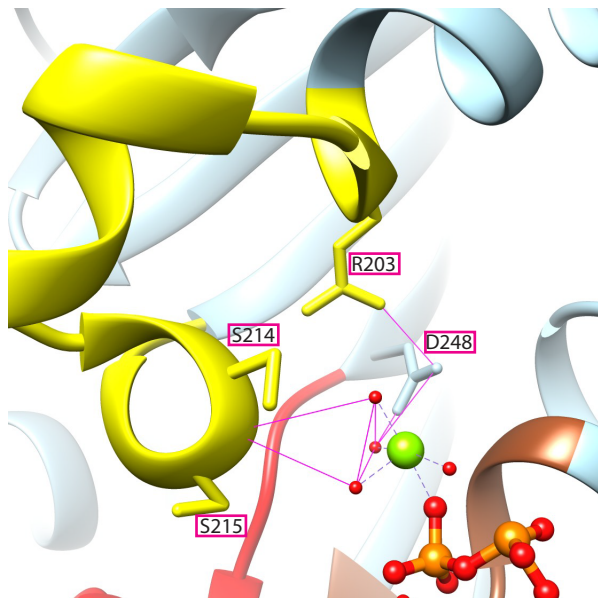

## Figure 2 S2

### Models

 Solution  
Mg-ADP K3  
(PDB 1I5S)

### Motifs

 Loop 9  P-loop  
 Loop 11

### Residues

 Conserved water-Mg  
network-coordinating residues
