# Supplementary material for: Conserved mechanisms of microtubule-stimulated ADP release, ATP binding, and force generation in transport kinesins
Source: eLife journal article supplement (doi:10.7554/elife.03680), 2014-09-10
Supplement: supp [file elife_poa_e03680_Figure_3_figure_supplement_1.pdf › elife_poa_e03680_Figure_3_figure_supplement_1.pdf]

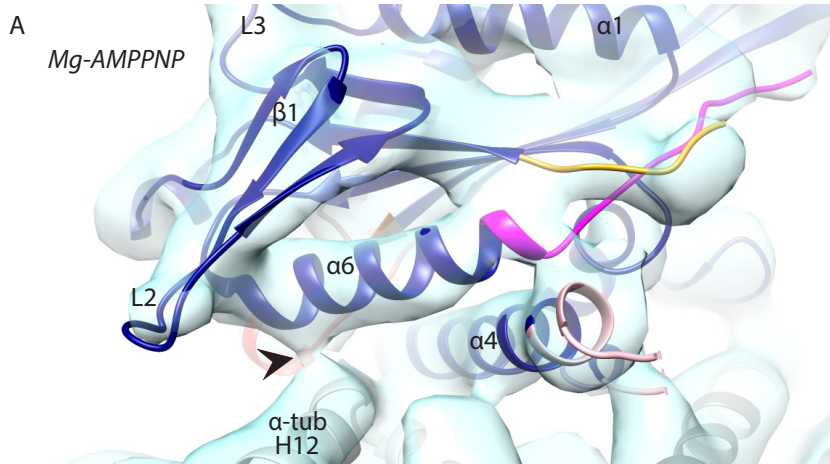

**Kin3-MT**

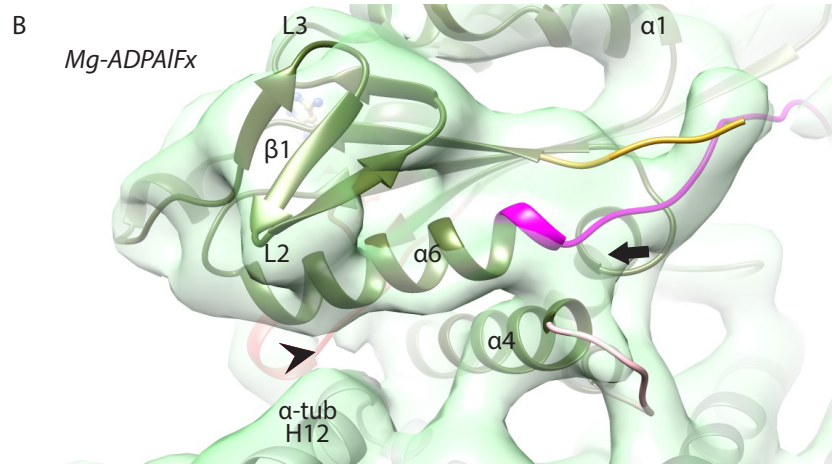

**Kin1-MT**

**Figure 3 S1**

**Models**

|                                                                                    |                      |                                                                                      |                      |
|------------------------------------------------------------------------------------|----------------------|--------------------------------------------------------------------------------------|----------------------|
|   | Kin3-Mg-AMPPNP       |   | Kin1-Mg-ADPAIFx-MT   |
|  | α-tubulin (PDB 1JFF) |  | β-tubulin (PDB 1JFF) |

**Motifs**

|                                                                                     |             |
|-------------------------------------------------------------------------------------|-------------|
|  | Neck linker |
|  | N-term      |
|  | Loop 12     |
