# Supplementary material for: Conserved mechanisms of microtubule-stimulated ADP release, ATP binding, and force generation in transport kinesins
Source: eLife journal article supplement (doi:10.7554/elife.03680), 2014-09-10

# Figure 3 S2

## Models

|                                                                                                      |                                                                                                     |                                                                                                                |
|------------------------------------------------------------------------------------------------------|-----------------------------------------------------------------------------------------------------|----------------------------------------------------------------------------------------------------------------|
|  Kin3-NN-MT         |  Kin1-NN-MT        |  $\alpha$ -tubulin (PDB 1JFF) |
|  Kin3-Mg-ADPAIFx-MT |  Kin1-Mg-AMPPNP-MT |  $\beta$ -tubulin (PDB 1JFF)  |

## Motifs

|                                                                                           |
|-------------------------------------------------------------------------------------------|
|  Loop 11 |
|  Loop 12 |

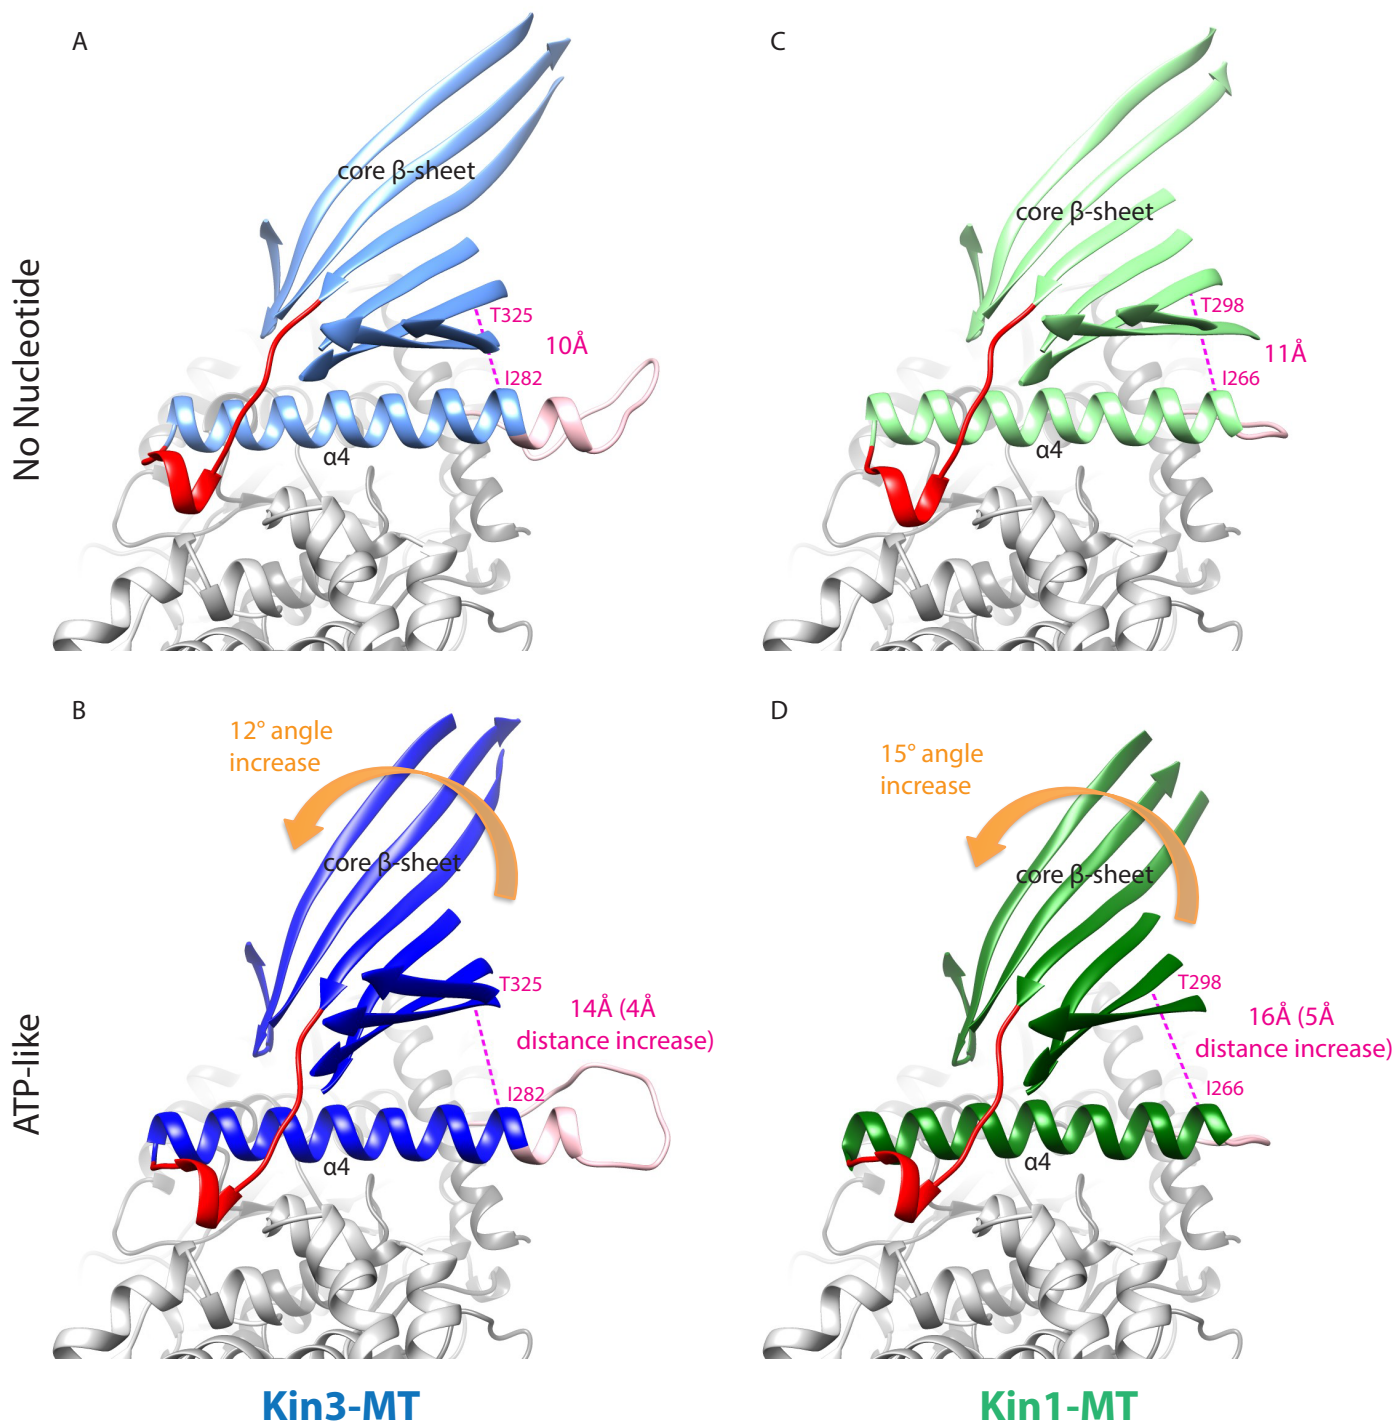

Supplement: supp [file elife_poa_e03680_Figure_3_figure_supplement_2.pdf › elife_poa_e03680_Figure_3_figure_supplement_2.pdf]
