# Supplementary material for: Conserved mechanisms of microtubule-stimulated ADP release, ATP binding, and force generation in transport kinesins
Source: eLife journal article supplement (doi:10.7554/elife.03680), 2014-09-10
Supplement: supp [file elife_poa_e03680_Figure_4_figure_supplement_1.pdf › elife_poa_e03680_Figure_4_figure_supplement_1.pdf]

A

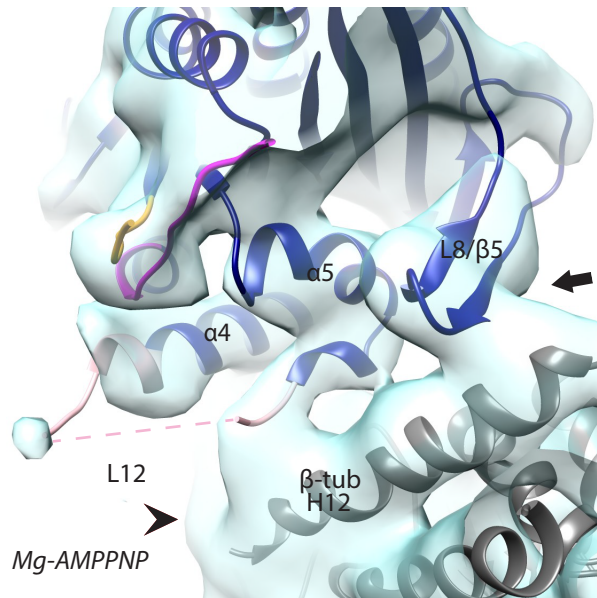**Kin3-MT**

B

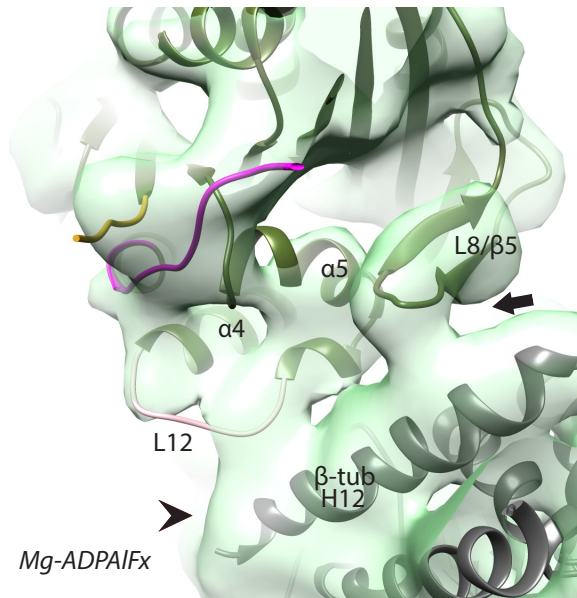**Kin1-MT****Figure 4 S1****Models**

|                                                                                                                  |                                                                                                                 |
|------------------------------------------------------------------------------------------------------------------|-----------------------------------------------------------------------------------------------------------------|
|  Kin3-Mg-AMPPNP               |  Kin1-Mg-ADPAIFx-MT          |
|  $\alpha$ -tubulin (PDB 1JFF) |  $\beta$ -tubulin (PDB 1JFF) |

**Motifs**

|                                                                                                 |                                                                                             |
|-------------------------------------------------------------------------------------------------|---------------------------------------------------------------------------------------------|
|  Neck linker |  Loop 12 |
|  N-term      |                                                                                             |
