# Supplementary material for: Conserved mechanisms of microtubule-stimulated ADP release, ATP binding, and force generation in transport kinesins
Source: eLife journal article supplement (doi:10.7554/elife.03680), 2014-09-10
Supplement: supp [file elife_poa_e03680_Figure_5_figure_supplement_2.pdf › elife_poa_e03680_Figure_5_figure_supplement_2.pdf]

A

No Nucleotide

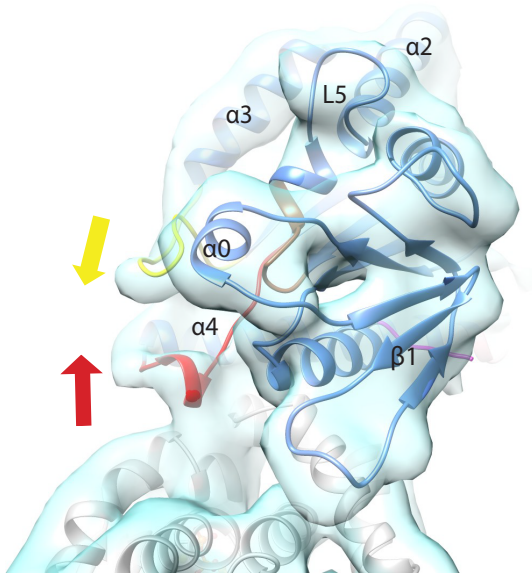

Mg-ATP

B

ATP-like

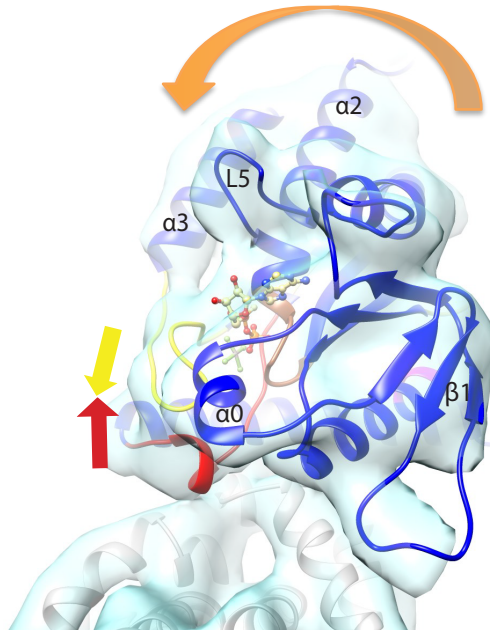

Kin3-MT

C

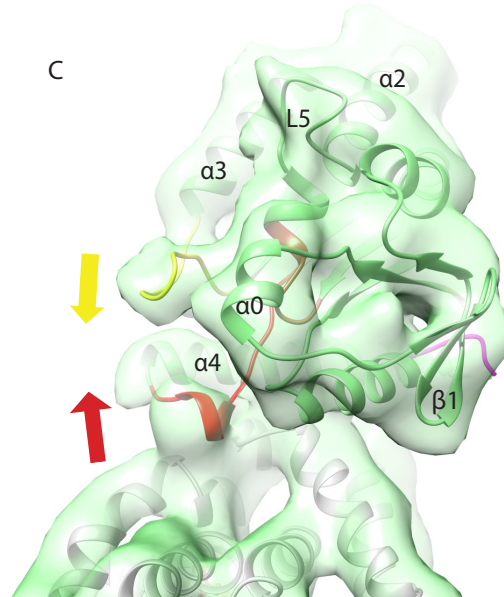

Mg-ATP

D

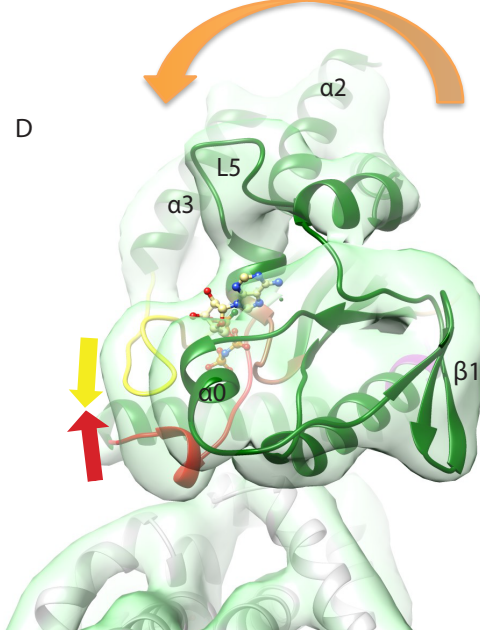

Kin1-MT

## Figure 5 S2

### Motifs

- Loop 9
- Loop 11
- P-loop
- Neck linker

### Models

- |                                                                                                                                                                               |                                                                                                                                                                             |
|-------------------------------------------------------------------------------------------------------------------------------------------------------------------------------|-----------------------------------------------------------------------------------------------------------------------------------------------------------------------------|
| <span style="display: inline-block; width: 20px; height: 10px; background-color: lightblue; border: 1px solid black; margin-right: 5px;"></span> Kin3-NN-MT                   | <span style="display: inline-block; width: 20px; height: 10px; background-color: lightgreen; border: 1px solid black; margin-right: 5px;"></span> Kin1-NN-MT                |
| <span style="display: inline-block; width: 20px; height: 10px; background-color: darkblue; border: 1px solid black; margin-right: 5px;"></span> Kin3-Mg-ADPAIFx               | <span style="display: inline-block; width: 20px; height: 10px; background-color: darkgreen; border: 1px solid black; margin-right: 5px;"></span> Kin1-Mg-AMPPNP-MT          |
| <span style="display: inline-block; width: 20px; height: 10px; background-color: lightgrey; border: 1px solid black; margin-right: 5px;"></span> $\alpha$ -tubulin (PDB 1JFF) | <span style="display: inline-block; width: 20px; height: 10px; background-color: darkgrey; border: 1px solid black; margin-right: 5px;"></span> $\beta$ -tubulin (PDB 1JFF) |
