# Supplementary figures and images for: Conserved mechanisms of microtubule-stimulated ADP release, ATP binding, and force generation in transport kinesins
Source: eLife journal article supplement (doi:10.7554/elife.03680), 2014-09-10

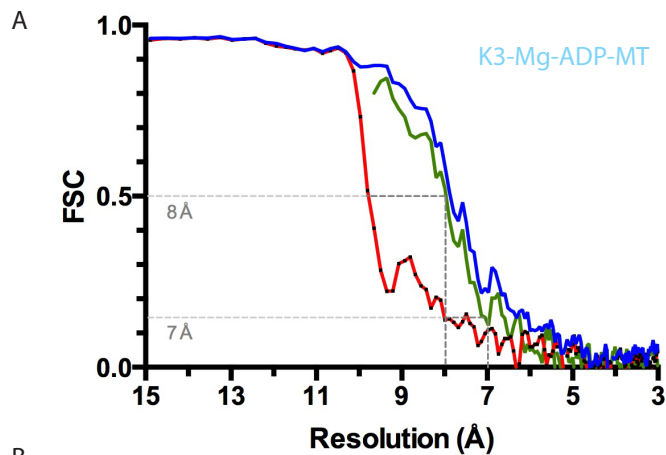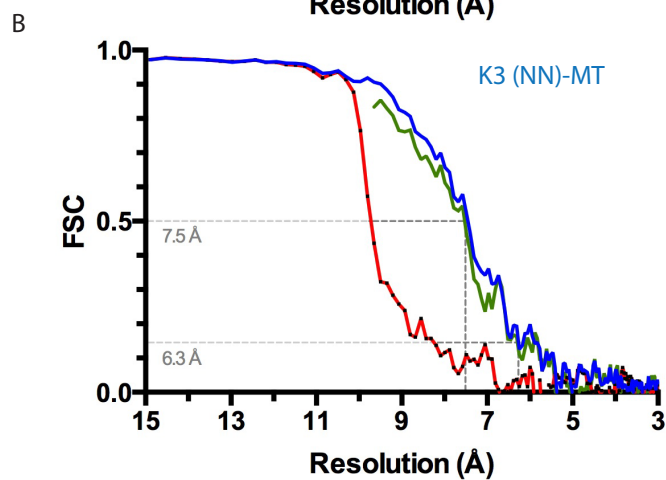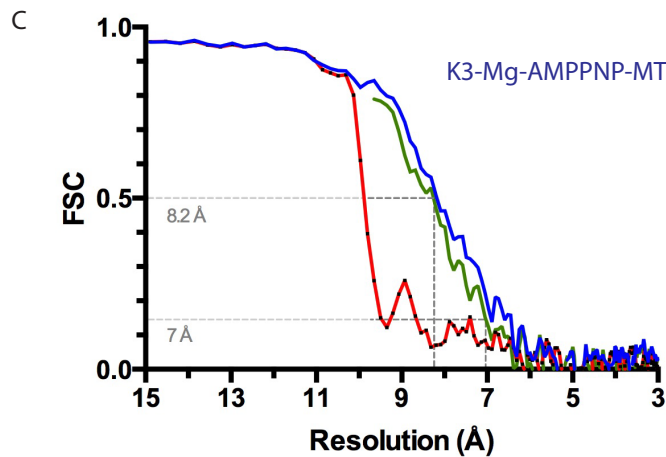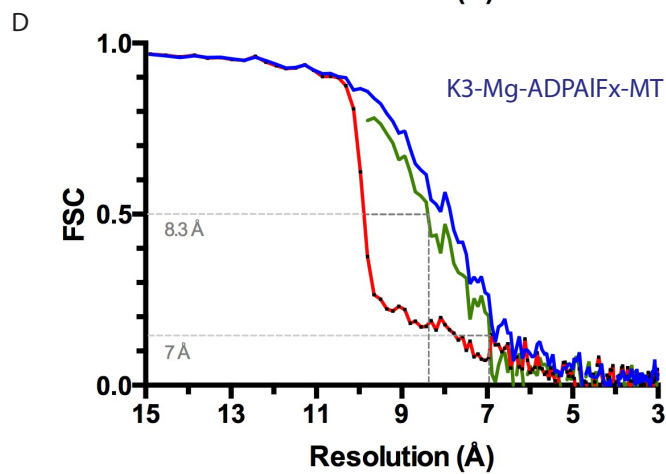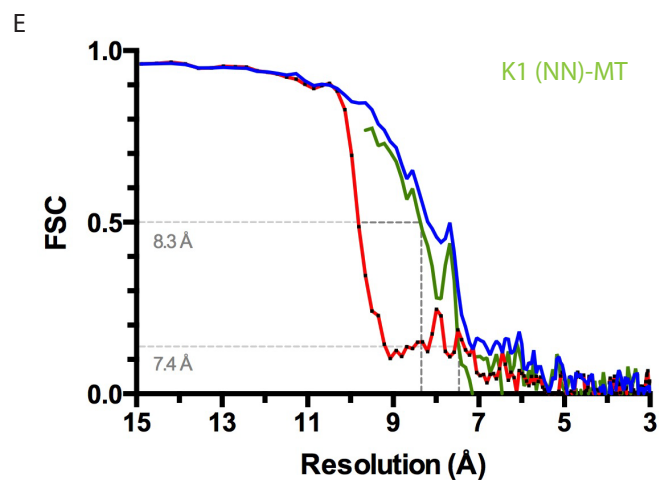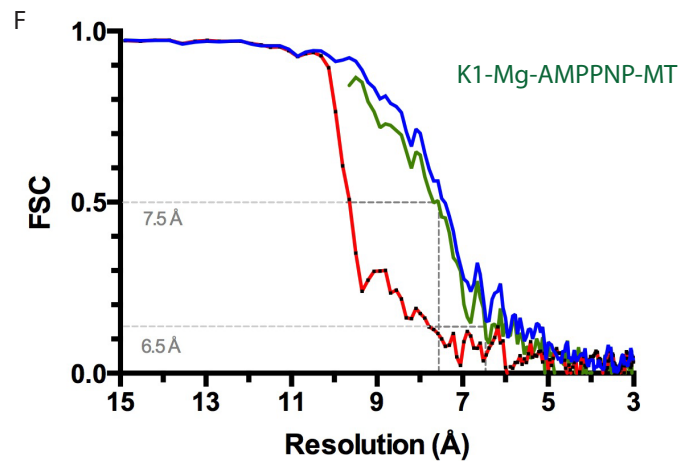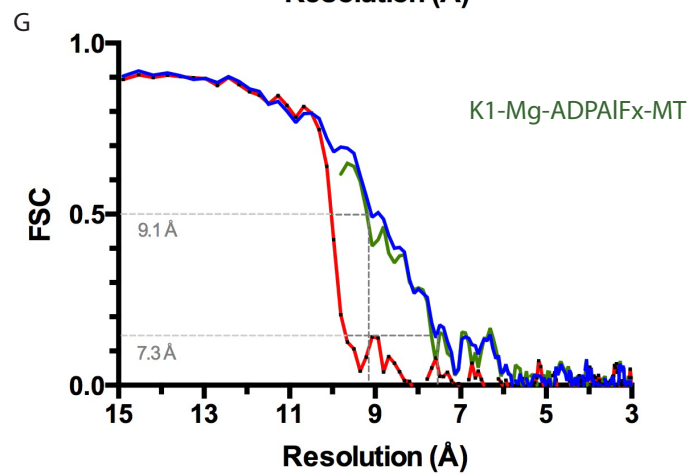

**Figure 1 S1**

**FSC curves**

— FSCt

— FSCn (random 10 Å)

— FSCtrue

Supplement: supp [file elife_poa_e03680_Figure_1_figure_supplement_1.pdf › elife_poa_e03680_Figure_1_figure_supplement_1.pdf]

Figure 1 S2

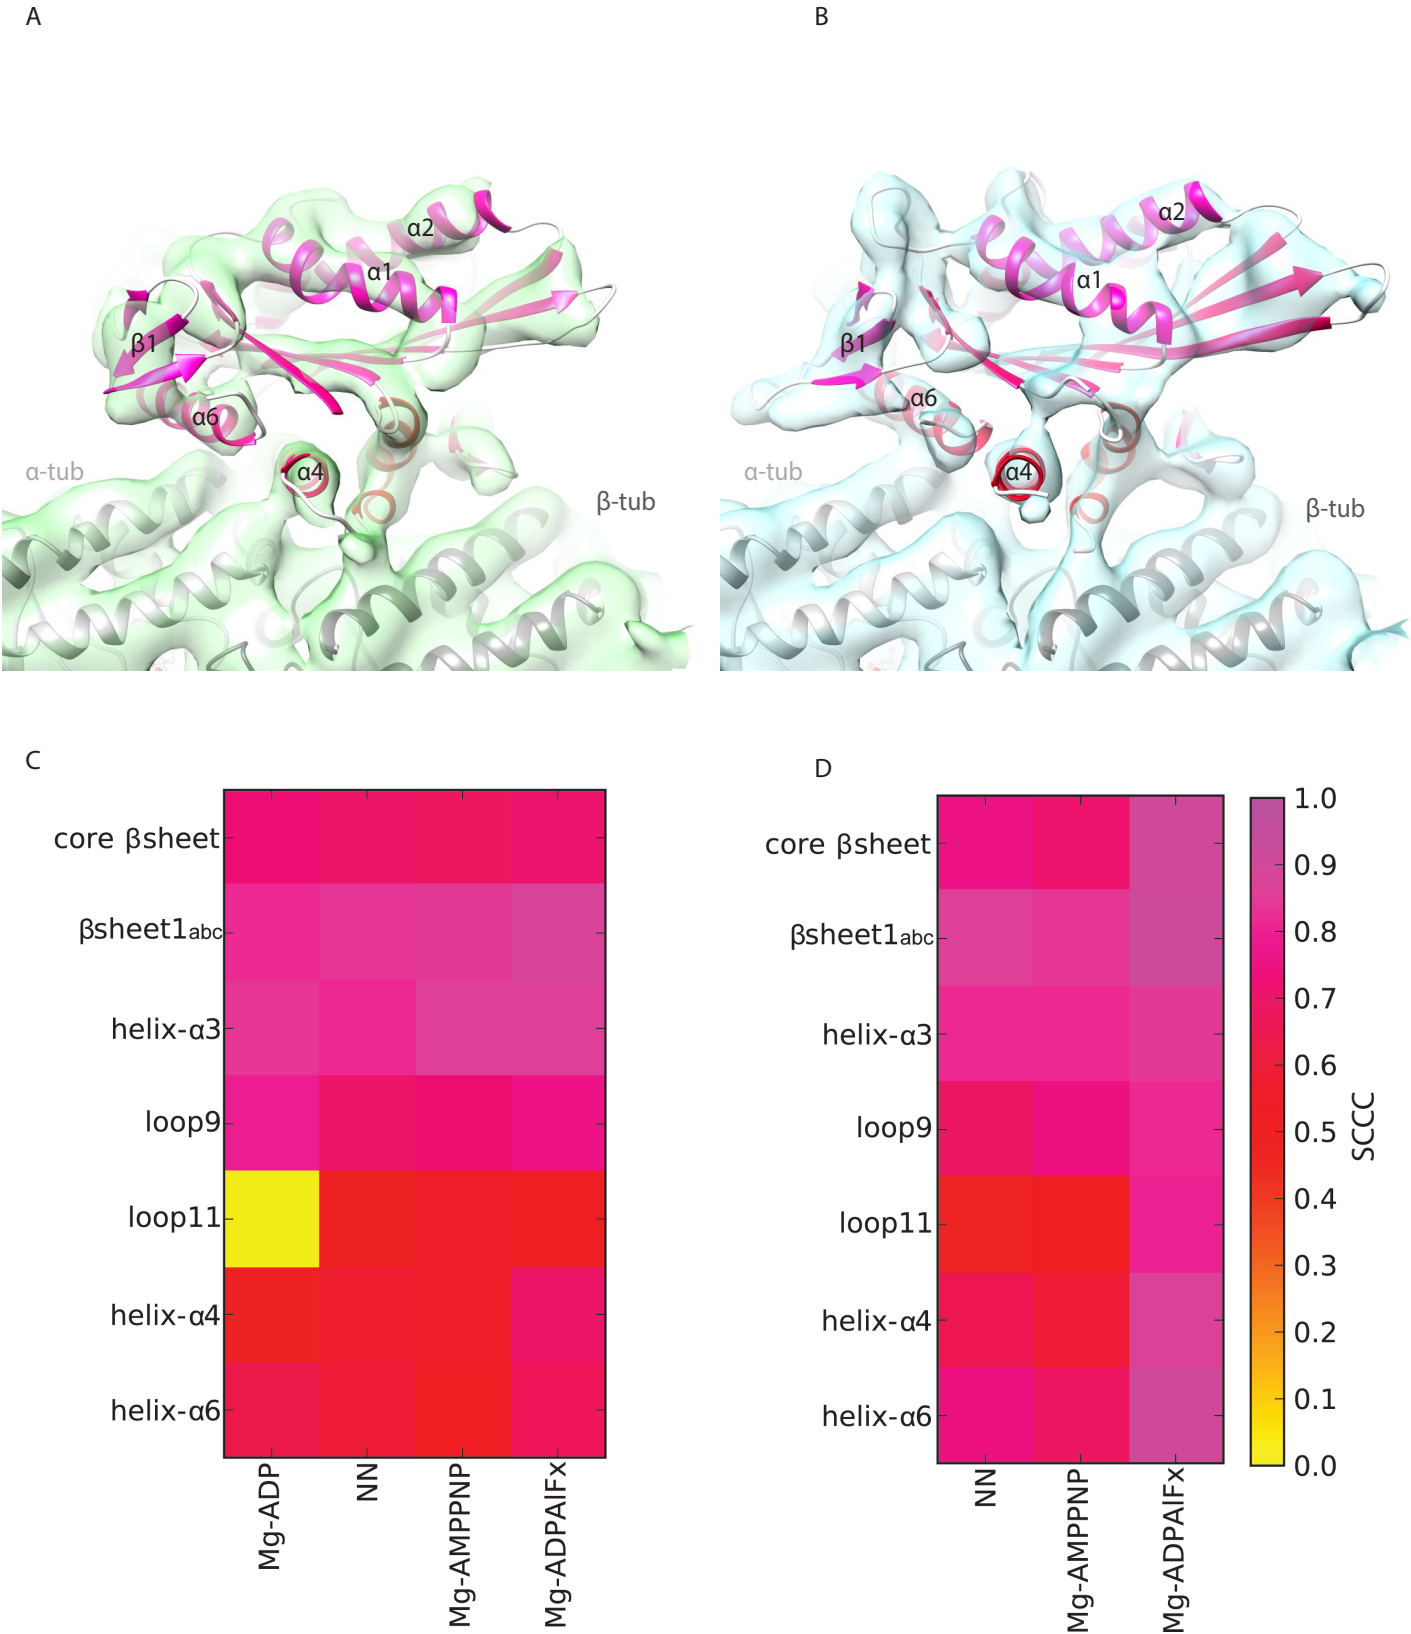

Supplement: supp [file elife_poa_e03680_Figure_1_figure_supplement_2.pdf › elife_poa_e03680_Figure_1_figure_supplement_2.pdf]

A

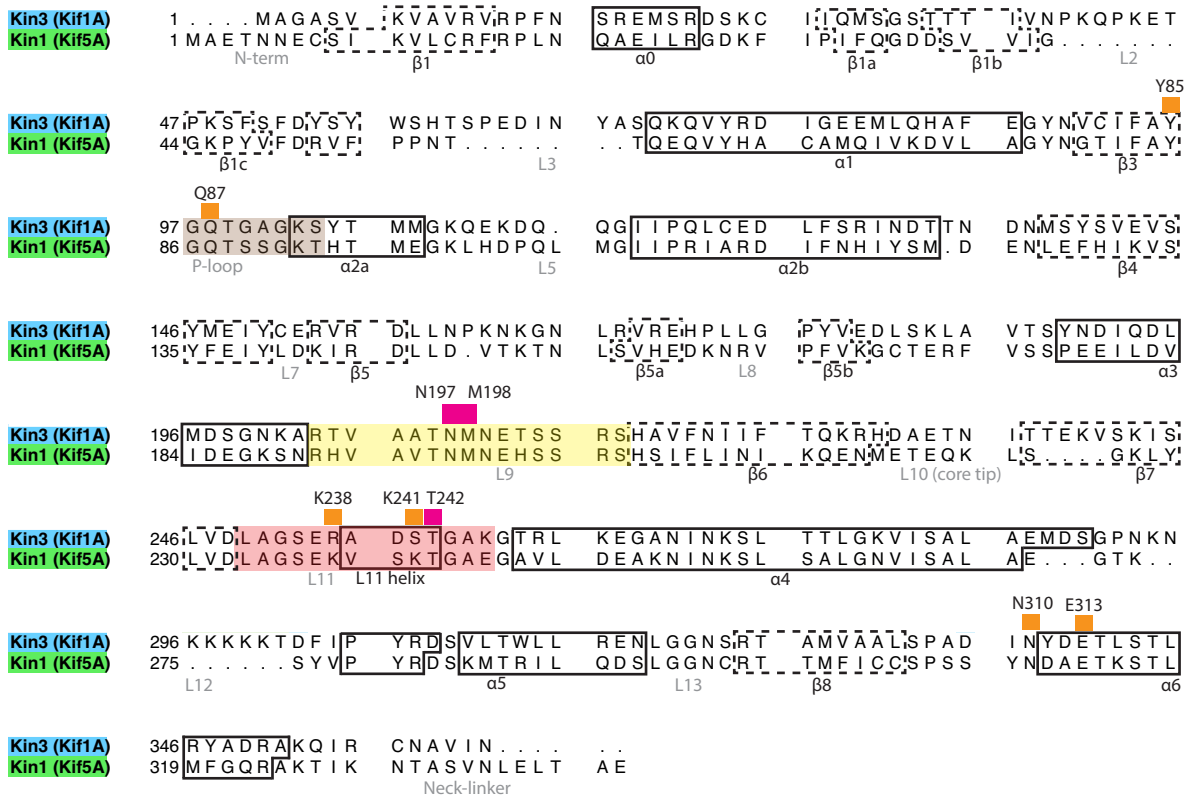

B

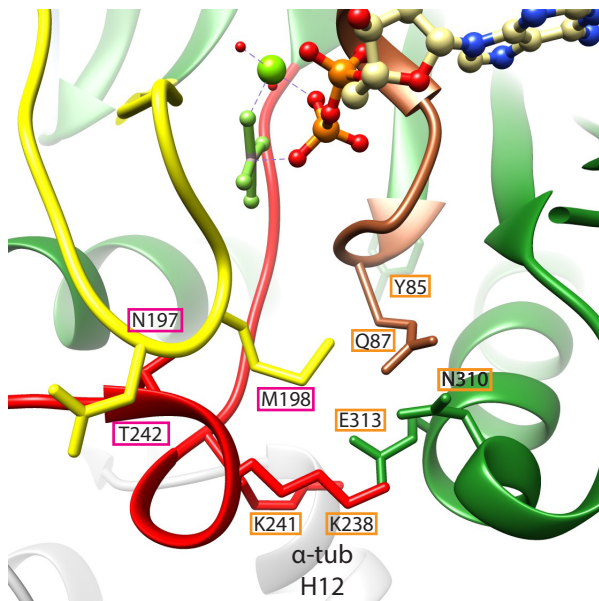

### Figure 2 S4

## Models

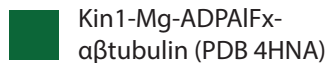

## Motifs

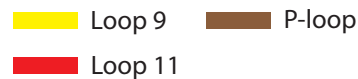

## Residues

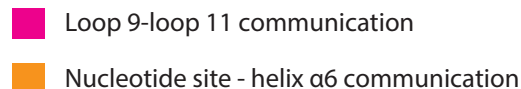

Supplement: supp [file elife_poa_e03680_Figure_2_figure_supplement_4.pdf › elife_poa_e03680_Figure_2_figure_supplement_4.pdf]

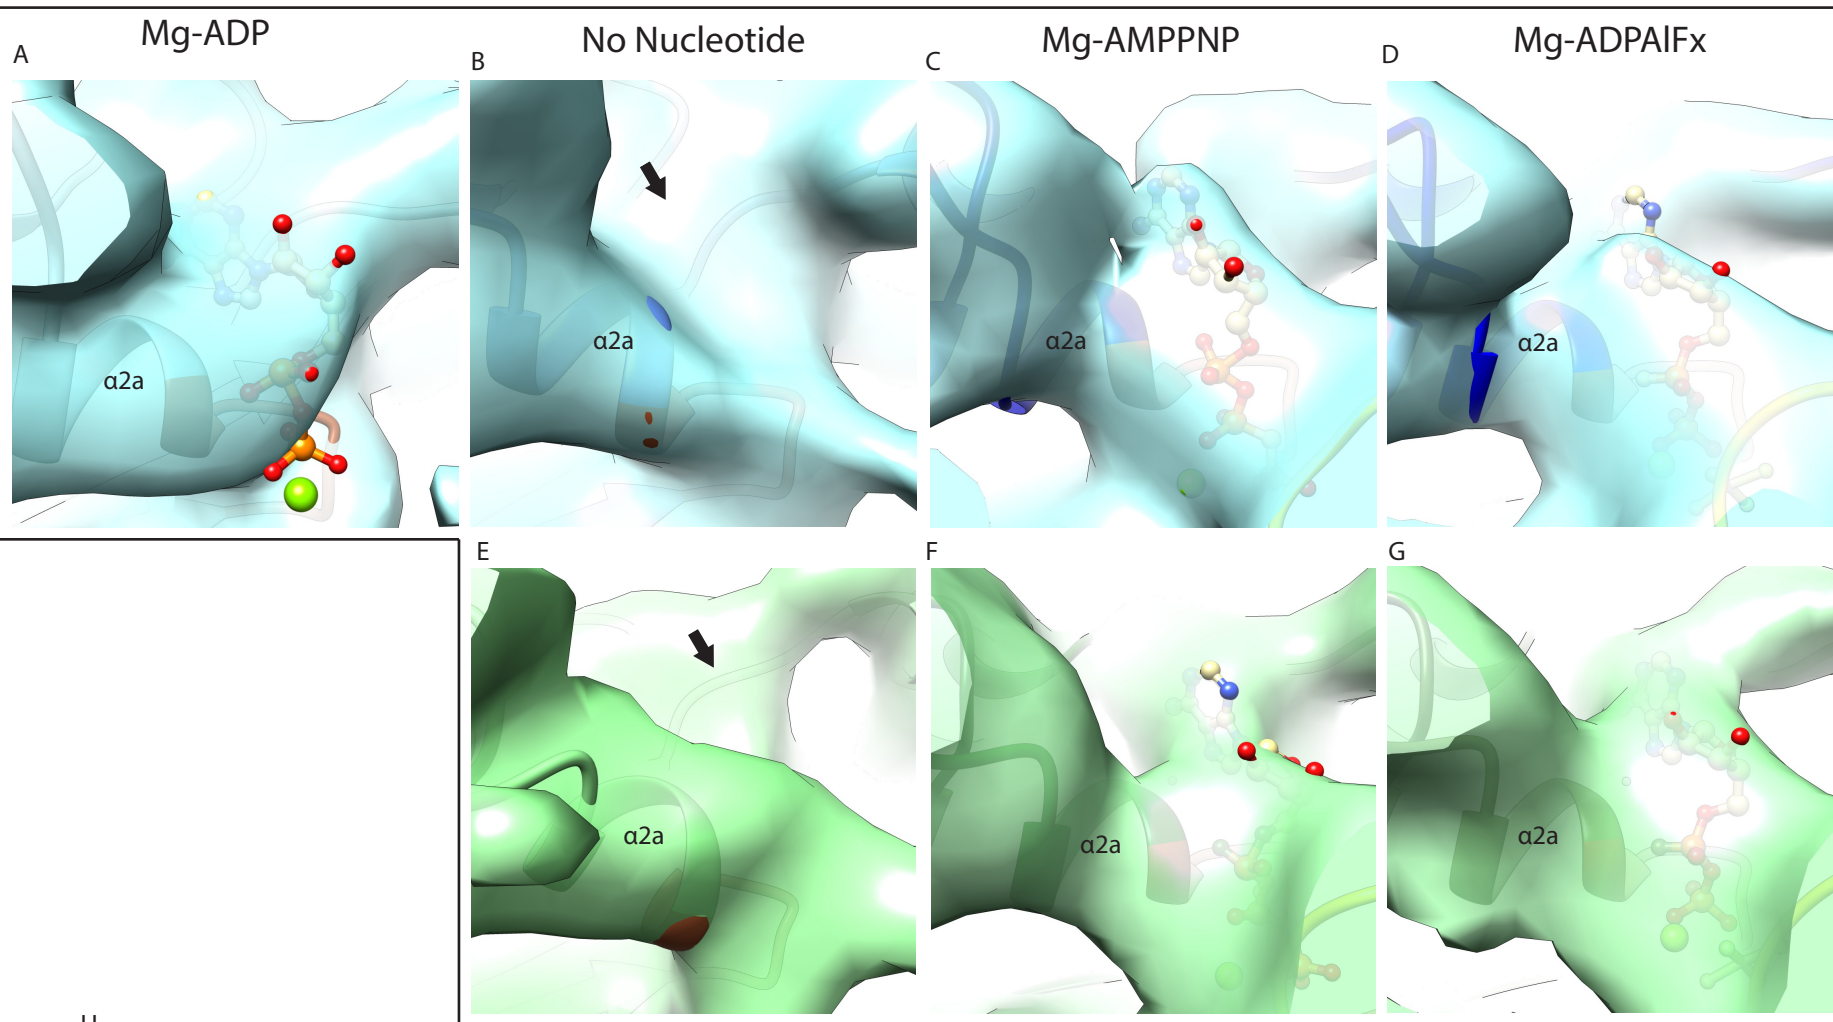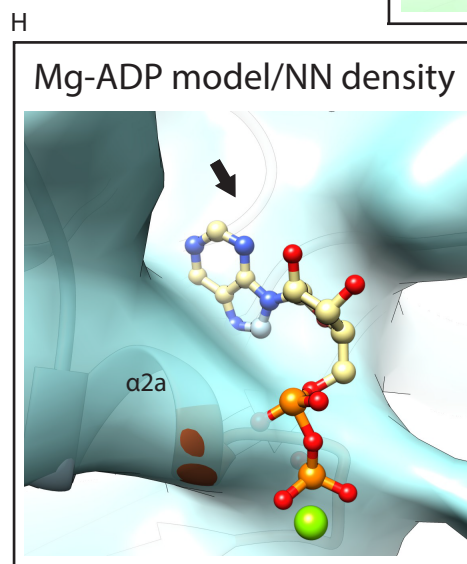

**Figure 2- figure supplement 5**

**Motifs**

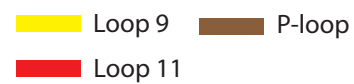

**Models**

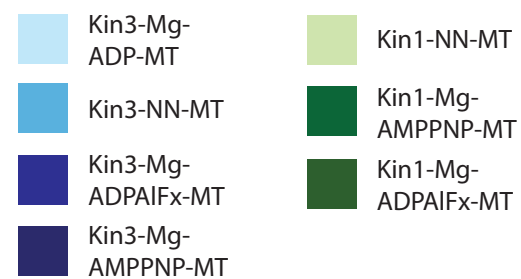

Supplement: supp [file elife_poa_e03680_Figure_2_figure_supplement_5.pdf › elife_poa_e03680_Figure_2_figure_supplement_5.pdf]

Figure 3 - Figure supplement 3

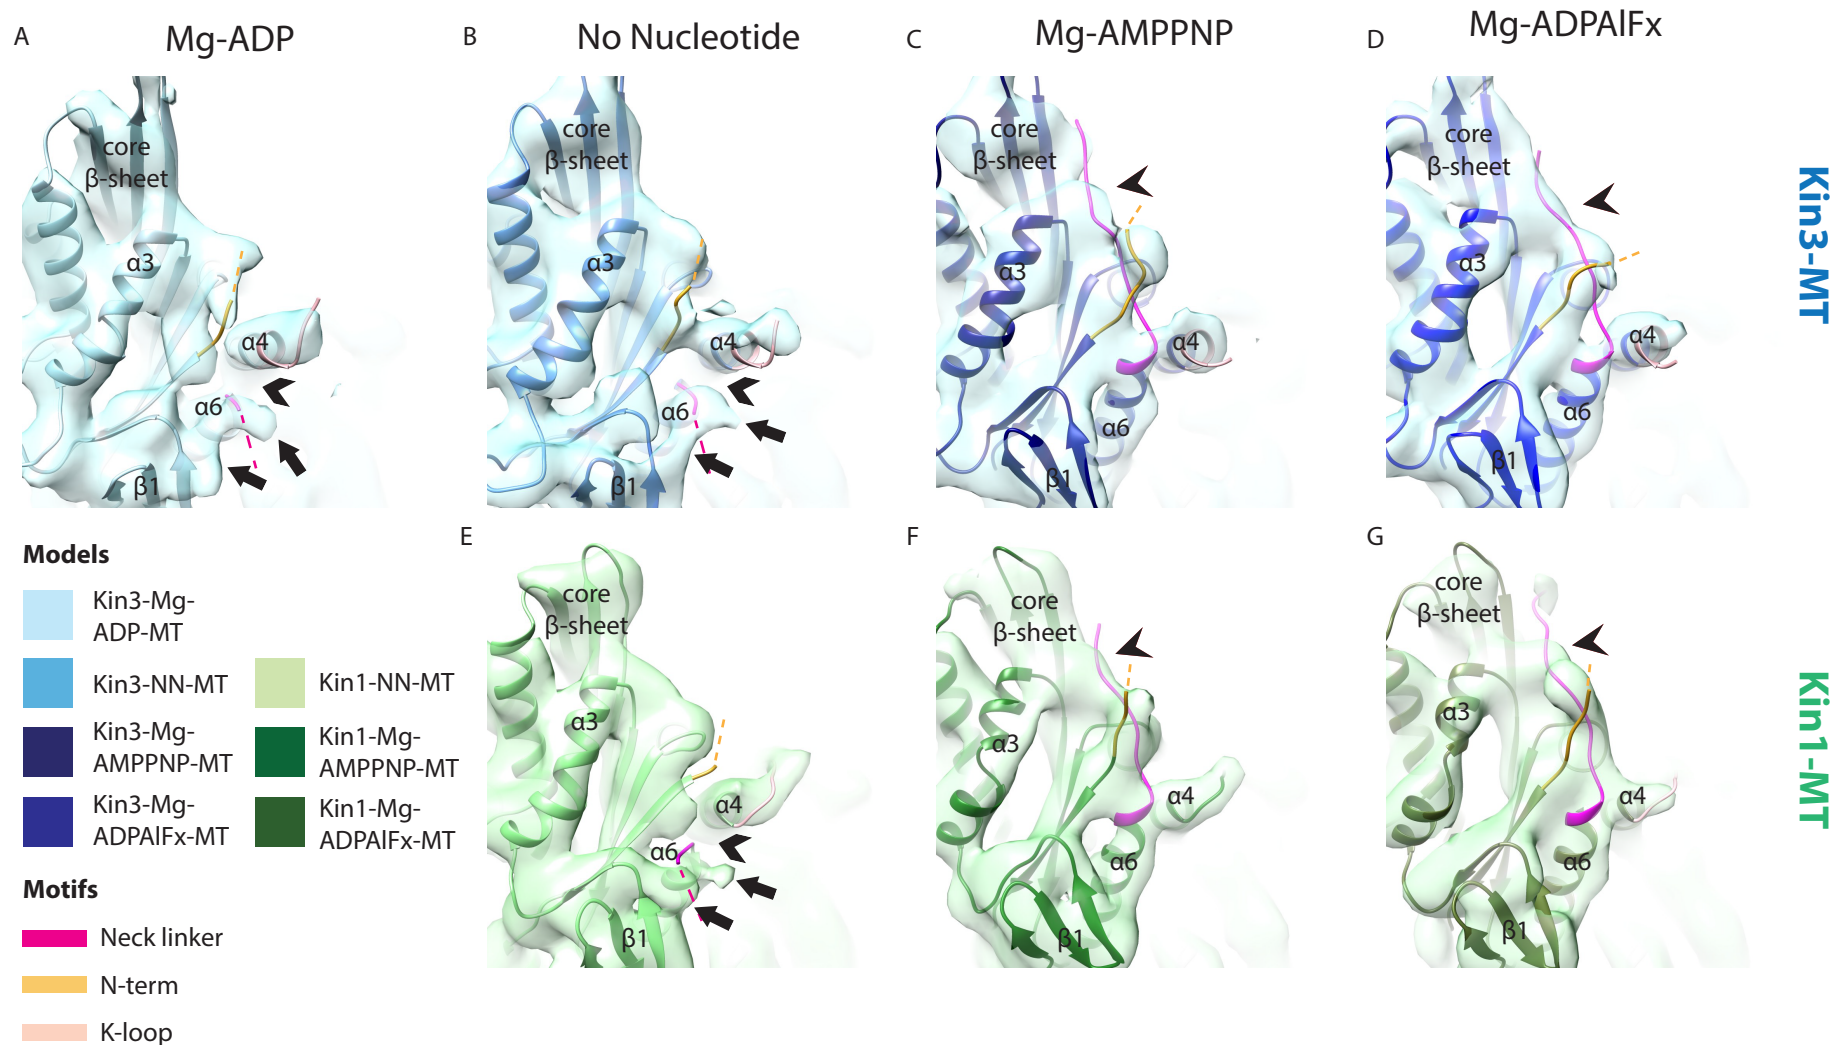

Supplement: supp [file elife_poa_e03680_Figure_3_figure_supplement_3.pdf › elife_poa_e03680_Figure_3_figure_supplement_3.pdf]

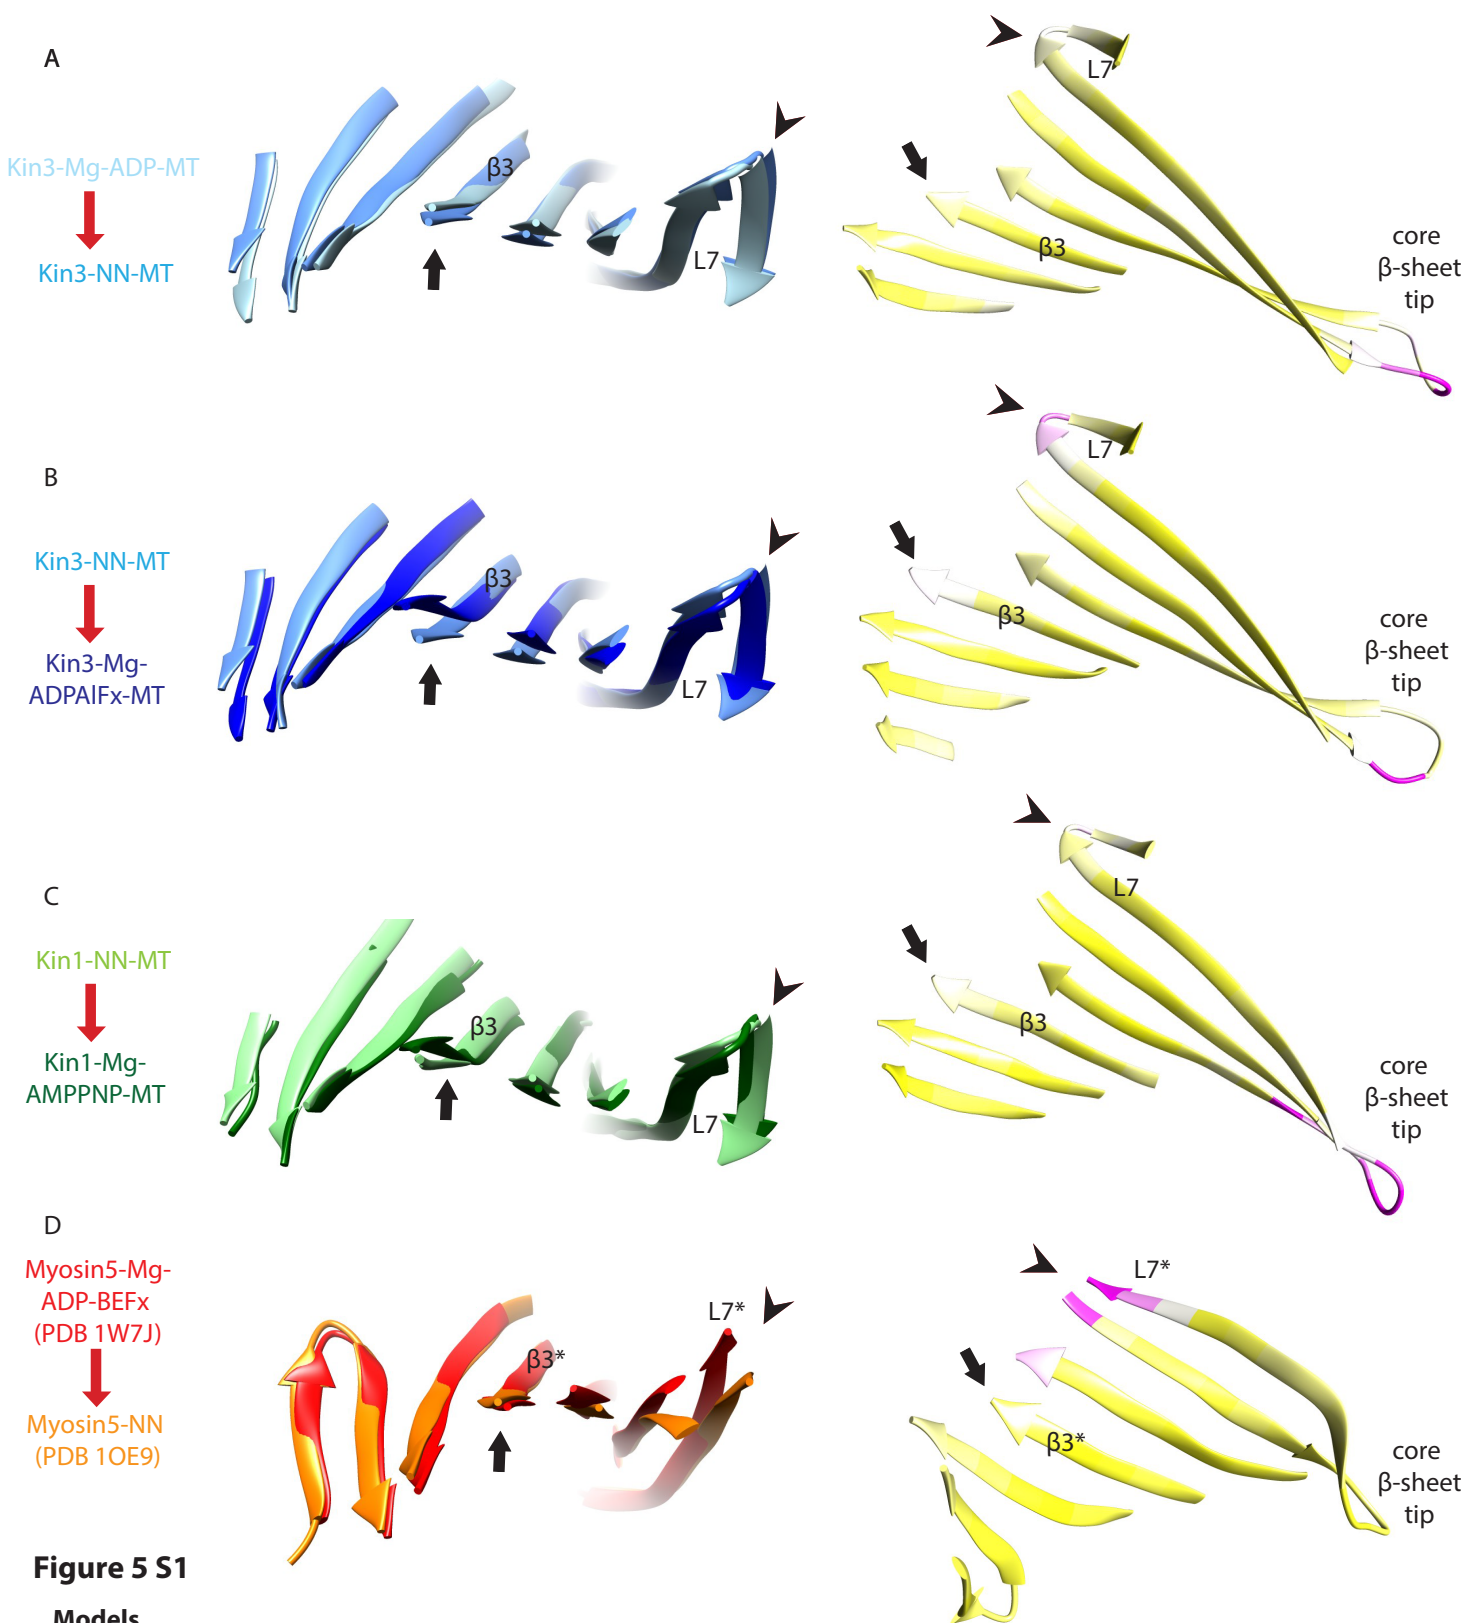

**Figure 5 S1**

**Models**

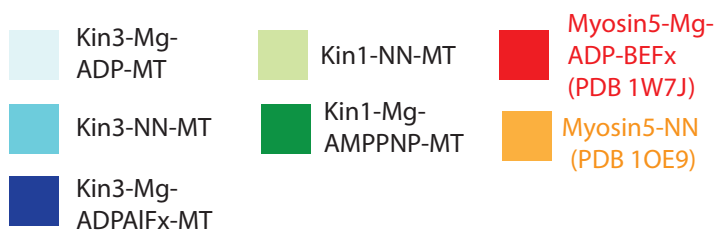

Supplement: supp [file elife_poa_e03680_Figure_5_figure_supplement_1.pdf › elife_poa_e03680_Figure_5_figure_supplement_1.pdf]
